# Supplementary material
Source: publisher site journal article supplement (https://www.kjim.org/upload/media/kjim-2023-184-Supplementary-Table-1.pdf)
Supplement: Supplementary file 1 [file kjim-2023-184-Supplementary-Table-1.pdf]

**Supplementary Table 1. Eligibility criteria**

|                                                                                              |
|----------------------------------------------------------------------------------------------|
| Inclusion criteria                                                                           |
| Adults 19 years and older who underwent endoscopic resection for gastric cancer              |
| Severe atrophic gastritis or intestinal metaplasia evaluated                                 |
| Mentioned about the method for evaluating severe atrophic gastritis or intestinal metaplasia |
| Gastric cancer occurred 1 year after endoscopic resection                                    |
| Follow-up for at least 2 years after endoscopic resection                                    |
| Dichotomous assessment of the effect on the incidence of metachronous gastric cancer         |
| Exclusion criteria                                                                           |
| Endoscopic resection for gastric 'adenoma'                                                   |
| Metachronous gastric 'adenoma' developed                                                     |
| The degree or evaluation method of atrophic gastritis is not clearly stated.                 |
